# Supplementary material
Source: Springer Nature journal article supplement (https://www.springermedizin.de/resource/supplementary/12882_2013_924_MOESM12_ESM.pdf/9454040)

**TYROBP expression**  
[ relative to actin units ]

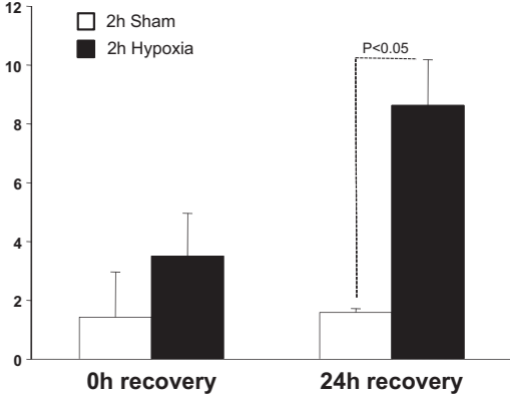

Supplement: MOESM12 [file 9454040]
